# Supplementary material for: Essential Role of Adhesion GPCR, GPR123, for Human Pluripotent Stem Cells and Reprogramming towards Pluripotency
Source: MDPI journal article supplement (doi:10.3390/cells12020304), 2023-01-13
Supplement: s1 [file s1]

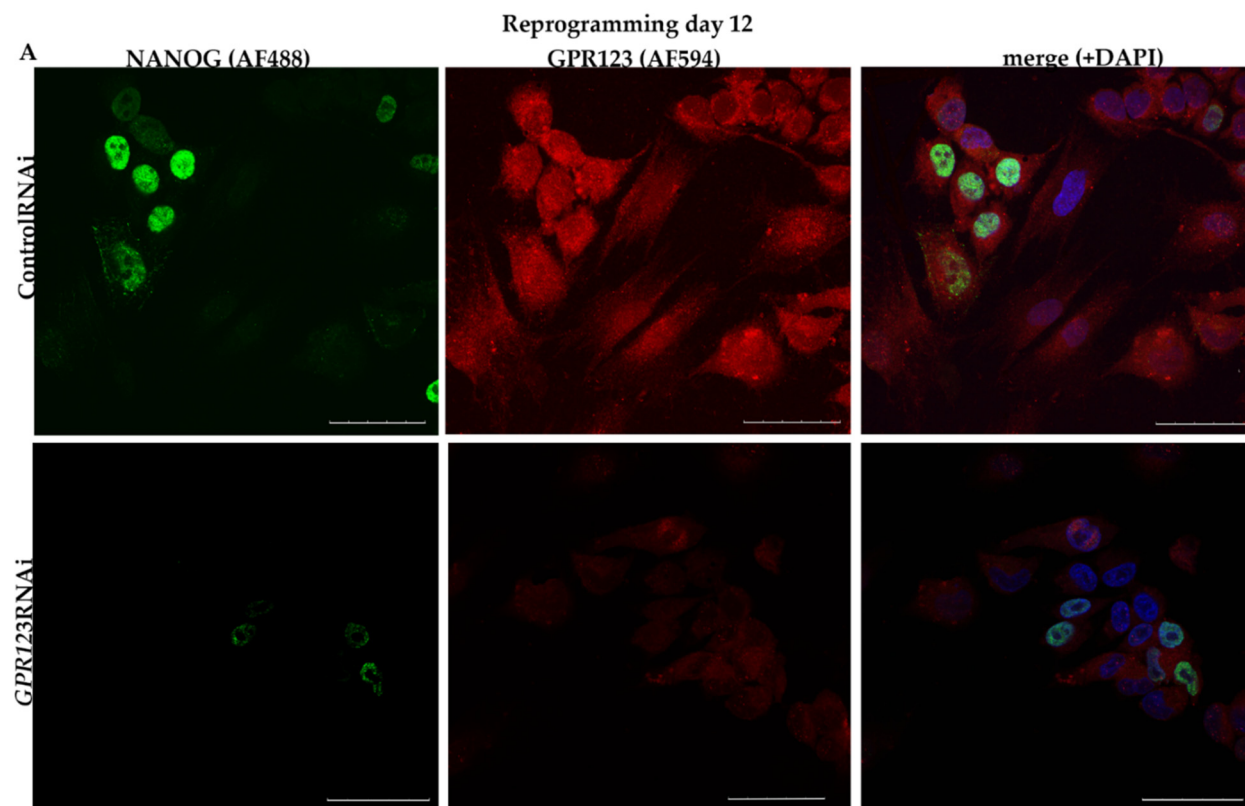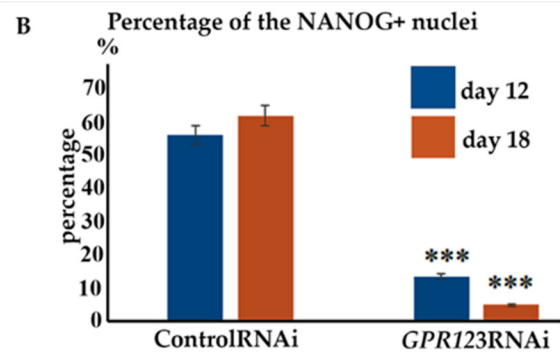

**Figure S1.** Downregulation of GPR123 significantly reduced the percentage of NANOG positive cells during the reprogramming process. (A): Representative Confocal immunofluorescence images of the NANOG and GPR123 staining in the Control (upper panel) and *GPR123*RNAi (bottom panel) hiPSCs at day 12 of the reprogramming process. Scale bar 50  $\mu$ m. (B): Graphical representation of the percentage of the NANOG+ nucleuses in Control and *GPR123*RNAi treated hiPSCs at day 12 of the reprogramming. At least 100 colonies were included in the analysis during three independent experiments.

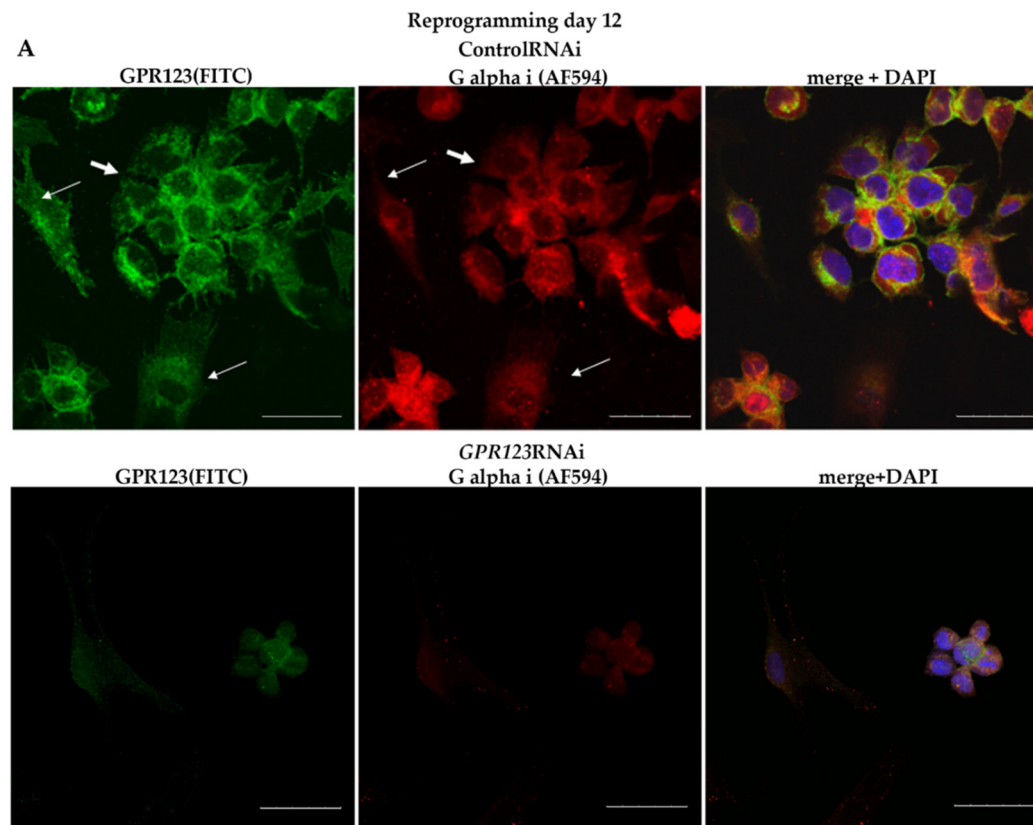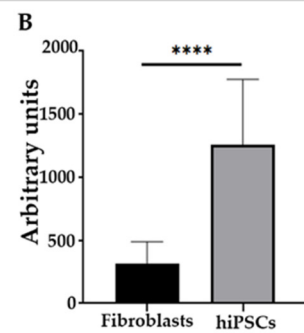

**Figure S2. Co-localization between Gai and GPR123 is lost under GPR123RNAi in hiPSCs at day 12 of the reprogramming process.** (A): Representative Confocal immunofluorescence images for Gai and GPR123 in hiPSCs treated with Control (upper panel) and GPR123RNAi (bottom panel) at day 12 of the reprogramming. Scale bar 50  $\mu$ m. (B): GPR123 (FITC) mean fluorescence intensity difference between fibroblasts and hiPSCs calculated in arbitrary units using ImageJ. Bars and error bars represent normalized means and s.d. ( $n = 25$  for each cell types; t-test,  $P < 0.0001$ ).

**Table S1.** List of the primers for qRT-PCR used in the present study.

**Table S1.** List of the primers for qRT-PCR used in the present study.

|                                   | Gene    | Forward Primer                | Reverse Primer              |
|-----------------------------------|---------|-------------------------------|-----------------------------|
| GPR123                            | ADGRA1  | GTC AAC GTC AGC AGA CTC GT    | CTT CTC GGA GGT GCA CGT TA  |
| cAMP-PKA pathway<br>related genes | ADCY5   | CAT TGA TAG GCT TCG GTC TG    | CGA TGG TGA TCT GGA CAA AG  |
|                                   | PRKAR1A | GGG AGC TTT GGA GAA CTT GC    | GCT TTC TCA GTG TGC TTC CC  |
| G-protein subunit alpha<br>genes  | GNAS    | CGA CGA CAC TCC CGT CAA C     | CCC GGA GAG GGT ACT TTT CCT |
|                                   | GNAI1   | TTAGGGCTATGGGGAGGTTGA         | GGTACTCTCGGGATCTGTTGAAA     |
|                                   | GNAI2   | TACCGGGCGGTTGTCTACA           | GGGTCGGCAAAGTCGATCTG        |
|                                   | GNAI3   | ATCGACCGCAACTTACGGG           | AGTCAATCTTTAGCCGTCCTCA      |
|                                   | GNAQ    | TGGGTCAGGATACTCTGATGAAG       | TGTGCATGAGCCTTATTGTGC       |
|                                   | GNA11   | GGCTTCACCAAGCTCGTCTAC         | CACTGACGTACTGATGCTCG        |
|                                   | GNAZ    | GGTCCCGGAGAATTGACCG           | ATGAGGGGCTTGTACTCCTTG       |
|                                   | GNAO1   | GGAGCAAGGCGATTGAGAAAA         | GGCTTGTACTGTTTCACGTCT       |
|                                   | GNA12   | CCGCGAGTTCGACCAGAAG           | TGATGCCAGAATCCCTCCAGA       |
|                                   | GNA13   | CAGCAACGCAAGTCCAAGGA          | CCAGCACCTCATACCTTTGA        |
|                                   | GNA14   | GAGCGATGGACACGCTAAGG          | TCCTGTCGTAACACTCCTGGA       |
|                                   | GNA15   | CCAGGACCCCTATAAAGTGACC        | GCTGAATCGAGCAGGTGGAAT       |
| Cell cycle-related genes          | CCNB1   | AAC TTT CGC CTG AGC CTA TTT T | TTG GTC TGA CTG CTT GCT CTT |
|                                   | CCNA    | CAT GGA CCT TCA CCA GAC CT    | TCT GGT GGG TTG AGG AGA G   |
|                                   | CCNE    | CCC CAA AGT CAC AGT CGA AG    | GGG GAG AGG AGA AGC CCT AT  |
|                                   | CCND1   | GGC GGA GGA GAA CAA ACA G     | AGG CGG TAG TAG GAC AGG A   |
|                                   | CCND2   | GGG GAG AGG AGA AGC CCT AT    | ATA TCC CGC ACG TCT GTA GG  |

|                                       |         |                                    |                                 |
|---------------------------------------|---------|------------------------------------|---------------------------------|
|                                       | CCND3   | CAT GTA CCC GCC ATC CAT            | AGC TTC GAT CTG CTC CTG AC      |
|                                       | CDC25A  | ACT TTG TCT GAT GAG GAT GAT GG     | GGT TGT CAA GGT TTG TAG TTC TC  |
|                                       | CDC25B  | AGA CAG TAG ACG GAA AGC AC         | GCT CTT CAG TAG GAA GCT CTC     |
|                                       | CDC25C  | GTC GCT ATC CAT ATG AGT ATC TGG    | GTC CTC TTC ACG CAG ACA G       |
| Apoptosis related genes               | BAX     | GAC GGC AAC TTC AAC TGG            | AAG TCC AAT GTC CAG CCC         |
|                                       | BAD     | TGA GTG ACG AGT TTG TGG AC         | CAA GTT CCG ATC CCA CCA         |
|                                       | BCL2L11 | GGC CCC TAC CTC CCT ACA            | GGG GTT TGT GTT GAT TTG TCA     |
|                                       | BCL2    | GCCTTCTTTGAGTTCGGTG                | GCC AGG AGA AAT CAA ACA GAG     |
|                                       | BCLXL   | CCAGGGACAGCATATCAGAG               | CAG TGT CTG GTC ATT TCC GA      |
|                                       | XIAP    | GGCAGATTATGAAGCACGG                | CCAATCAGTTAGCCCTCCTC            |
| Pluripotency marker genes             | MYC     | TCG CAA GAC TCC AGC GCC TT         | GGA GCC CCA ATT AAA GGC G       |
|                                       | OCT4    | GAG AAC CGA GTG AGA GGC AAC C      | CAT AGT CGC TGC TTG ATC GCT TG  |
|                                       | NANOG   | AAT ACC TCA GCC TCC AGC AGA TG     | TGC GTC ACA CCA TTG CTA TTC TTC |
|                                       | SOX2    | TTG TTC GAT CCC AAC TTT CC         | ACA TGG ATT CTC GGC AGA CT      |
|                                       | KLF4    | TTA CCA AGA GCT CAT GCC ACC        | GCG AAT TTC CAT CCA CAG CC      |
| Ectoderm marker genes                 | SOX1    | GGA ATG GGA GGA CAG GAT TT         | ACT TTT ATT TCT CGG CCC GT      |
|                                       | NESTIN  | GAG AGG GAG GAC AAA GTC CC         | CCA CTT CCT CAG ACT GCT CC      |
|                                       | PAX6    | AGT TCT TCG CAA CCT GGC TA         | TGG TAT TCT CTC CCC CTC CT      |
| Mesoderm/<br>mesendoderm marker genes | MIXL    | GAG ACT TGG CAC GCC TGT            | GGT ACC CCG ACA TCC ACT T       |
|                                       | HAND1   | ACC AGC TAC ATC GCC TAC CTG ATG    | TCC CTA TTA ACG CCG CTC CAT     |
|                                       | MSX2    | TGG ATG CAG GAA CCC GG             | AGG GCT CAT ATG TCT TGG CG      |
|                                       | T       | CAG TGG CAG TCT CAG GTT AAG AAG GA | CGC TAC TGC AGG TGT GAG CAA     |
|                                       | FOXA2   | GCA TTC CCA ATC TTG ACA CGG TGA    | GCC CTT GCA GCC AGA ATA CAC ATT |
| Endoderm marker genes                 | CDX2    | CTC GGC AGC CAA GTG AAA AC         | CTC CTT TGC TCT GCG GTT CT      |
|                                       | SOX17   | CGC ACG GAA TTT GAA CAG TA         | GGA TCA GGG ACC TGT CAC AC      |
|                                       | GATA4   | TCC AAA CCA GAA AAC GGA AG         | AAG GCT CTC ACT GCC TGA AG      |
|                                       | VIM     | GAGAACTTTGCCGTTGAAGC               | GCT TCC TGT AGG TGG CAA TC      |
|                                       | EOMES   | CCA GGT TCT GGC TTC CGT G          | TAC ATT TTG TTG CCC TGC ATG TT  |
| MET-related genes                     | CDH1    | TGC CCA GAA AAT GAA AAA GG         | GTG TAT GTG GCA ATG CGT TC      |
|                                       | CDH2    | ACA GTG GCC ACC TAC AAA GG         | CCG AGA TGG GGT TGA TAA TG      |

|                    |      |        |                                |                                    |
|--------------------|------|--------|--------------------------------|------------------------------------|
|                    | ZEB1 |        | CCA CAC GAC CAC AGA TAC GG     | CCT GAG GAG AAC TGG TTG CC         |
|                    |      | TWIST1 | CCT CCC TGT CAG ATG AGG AC     | TCT GGA GGA CCT GGT AGA GG         |
|                    |      | SNAI1  | CCT CCC TGT CAG ATG AGG AC     | CCA GGC TGA GGT ATT CCT TG         |
|                    |      | SNAI2  | GGG GAG AAG CCT TTT TCT TG     | TCC TCA TGT TTG TGC AGG AG         |
| Housekeeping genes |      | GAPDH  | TGC ACC ACC AAC TGC TTA GC     | GGC ATG GAC TGT GGT CAT GAG        |
|                    |      | RN18S  | GAA ACT GCG AAT GGC TCA TTA A  | GAA TTA CCA CAG TTA TCC AAG TAG GA |
|                    |      | RPL13A | CCT GGA GGA GAA GAG GAA AGA GA | TTG AGG ACC TCT GTG TAT TTG TCA A  |

**Table S2.** List of the primary antibodies used in the present study.

| Target                    | Source                    | Cat. No   |
|---------------------------|---------------------------|-----------|
| anti-GPR123               | GeneTex, US               | GTX55266  |
| anti-OCT4                 | Cell Signaling Technology | 2890      |
| anti-Nanog                | ThermoFisher Scientific   | PA1-097X  |
| anti-Vimentin             | Cell Signaling Technology | 5741      |
| anti-E-cadherin           | Cell Signaling Technology | 3195      |
| anti-N-cadherin           | BD Biosciences, US        | 610921    |
| anti-cyclin D1            | Santa Cruz                | sc-246    |
| anti-cyclin E             | Santa Cruz                | sc-481    |
| anti-cyclin B1            | Santa Cruz                | sc-752    |
| anti-cyclin A1            | Santa Cruz                | sc-7852   |
| anti-p-CREB (Ser133)      | Cell Signaling Technology | 9198      |
| anti-p-ERK(Thr202/Tyr204) | Cell Signaling Technology | 4370      |
| anti-p-FAK (Tyr397)       | Cell Signaling Technology | 8556      |
| anti- $\beta$ -actin      | Santa Cruz                | sc-130656 |
| anti-GAPDH                | Cell Signaling Technology | 2118      |
